# Supplementary material for: Med13p prevents mitochondrial fission and programmed cell death in yeast through nuclear retention of cyclin C
Source: PubMed Central journal article supplement — Mol Biol Cell. 2014 Sep 15;25(18):2807–16. doi: 10.1091/mbc.E14-05-0953 (PMC4161515; doi:10.1091/mbc.e14-05-0953), 2014-09-15

# Supplemental Materials

*Molecular Biology of the Cell*

Khakhina et al.

Figure S1. Med13p reduces cyclin C destruction kinetics in stressed cells. (A) Subcellular localization of cyclin C-YFP was monitored in a *med12Δ* mutant strain (RSY1700) before and after H<sub>2</sub>O<sub>2</sub> addition (0.8 mM) as indicated. Mitochondria and nuclei were identified by mt-DsRed expression and DAPI staining, respectively. (B) myc-cyclin C levels were monitored by Western blot analysis in a wild type (RSY10) or *med13Δ* mutant (RSY1701) before (0 min) and following H<sub>2</sub>O<sub>2</sub> addition (0.8 mM) as indicated. (C) Western blot analysis of myc-cyclin C expressed from the inducible *GAL1* promoter before and after addition of glucose to repress transcription for the times indicated. In both panels, Tub1p levels were used as loading controls and V indicates the vector control.

Figure S2. Med13p-YFP remains nuclear following oxidative stress. Wild-type culture (RSY1812) expressing endogenously tagged *MED13*-YFP allele before (top panels) or following (bottom panels) H<sub>2</sub>O<sub>2</sub> treatment as indicated. Fluorescence microscopy was used to monitor the location of Med13-YFP, the nucleolus (Nop1p-RFP) and the nucleus (DAPI). Bar = 5 μM.

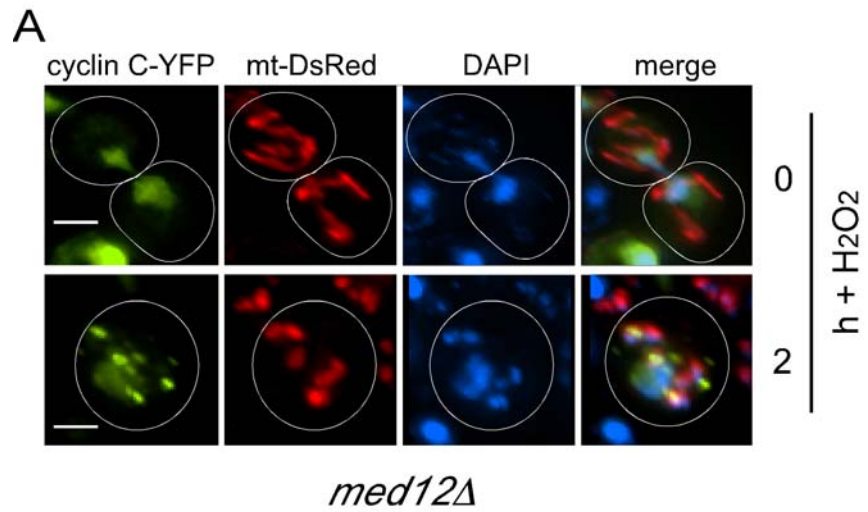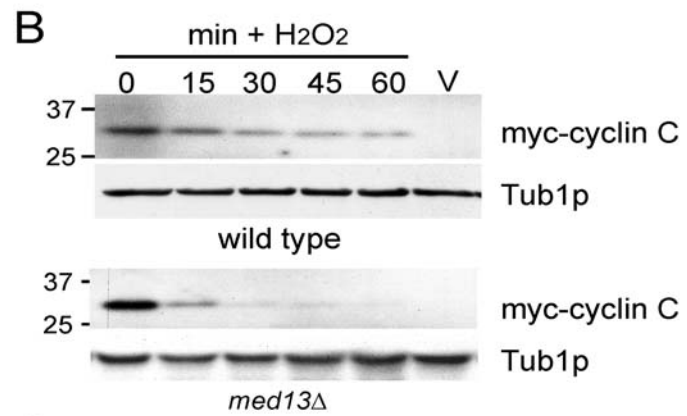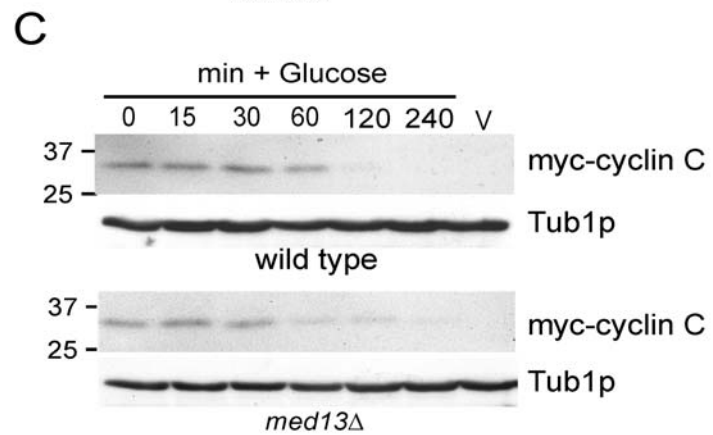

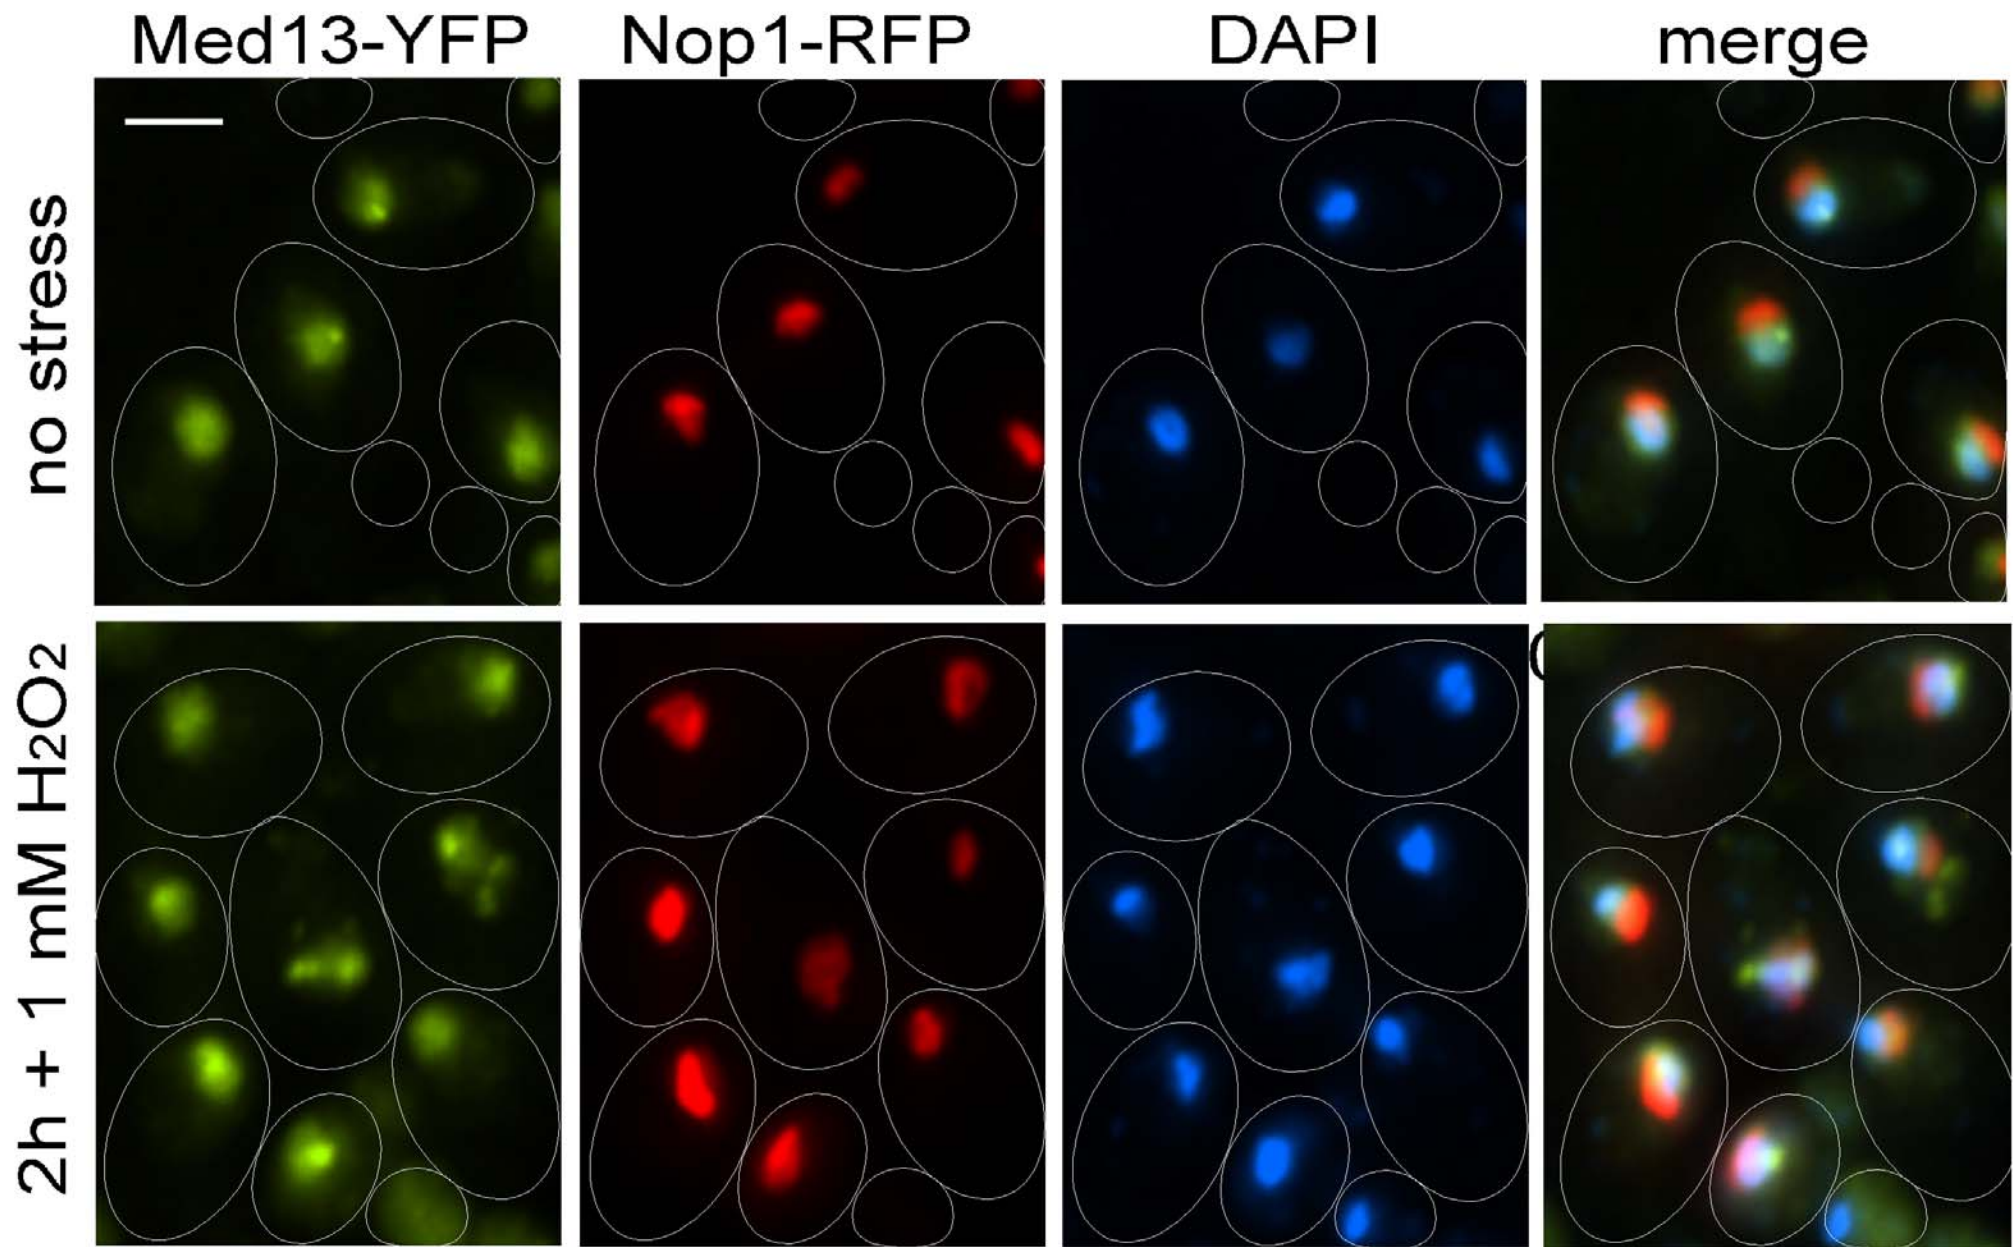

Supplement: supp_E14-05-0953_CombinedSupMats.pdf [file supp_E14-05-0953_CombinedSupMats.pdf]
